# Supplementary material for: Patient-specific computer-based decision support in primary healthcare—a randomized trial
Source: PubMed Central journal article supplement (PMC3901002; doi:10.1186/1748-5908-9-15), 2014-01-20
Supplement: 1748-5908-9-15-S1.pdf [file 1748-5908-9-15-S1.pdf]

Additional file 1 – Examples of implemented decision support rules for diabetes and the reminders that may be triggered depending on the patient.

| Decision support rule description                                                                                                                                                                                                                                                                                                                                                                                                                                                                                                                                                                                                                                                                               | Reminder number | Reminder short version                                      | Reminder long version                                                                                                                                                                                                                                           |
|-----------------------------------------------------------------------------------------------------------------------------------------------------------------------------------------------------------------------------------------------------------------------------------------------------------------------------------------------------------------------------------------------------------------------------------------------------------------------------------------------------------------------------------------------------------------------------------------------------------------------------------------------------------------------------------------------------------------|-----------------|-------------------------------------------------------------|-----------------------------------------------------------------------------------------------------------------------------------------------------------------------------------------------------------------------------------------------------------------|
| <p>Metformin is the first choice oral hypoglycaemic agent in type 2 diabetes (scr00016)<br/>                     The script is launched if the diagnosis is type 2 diabetes.<br/>                     First, the script checks whether the drug list contains metformin. If it does not, the script checks for the plasma/serum creatinine value. If the GFR is in the normal range, reminder 1 is shown. If GFR &lt; 60 ml/min, reminder 2 is shown. If GFR is missing or not fresh enough, reminder 3 is shown.</p>                                                                                                                                                                                           | 1               | Type 2 diabetes - start metformin?                          | This patient has type 2 diabetes. Metformin is the drug of choice for better glycaemic control.                                                                                                                                                                 |
|                                                                                                                                                                                                                                                                                                                                                                                                                                                                                                                                                                                                                                                                                                                 | 2               | Type 2 diabetes - start metformin?<br>Note GFR.             | This patient has type 2 diabetes. Metformin is the drug of choice for better glycaemic control. This patient's glomerular filtration rate, calculated with the MDRD formula (@1), is at a level where a lower than usual dose of metformin should be considered |
|                                                                                                                                                                                                                                                                                                                                                                                                                                                                                                                                                                                                                                                                                                                 | 3               | Type 2 diabetes - check renal function and start metformin? | This patient has type 2 diabetes. Metformin is the drug of choice for better glycaemic control. Consider checking renal function and starting metformin.                                                                                                        |
| <p>UKPDS Risk Engine to calculate cardiovascular and stroke risk in patients with type 2 diabetes (scr00129)<br/>                     The UKPDS calculators for cardiovascular and stroke risk are applied to the patient data. If the cardiovascular risk in 10 years exceeds 10% or the stroke risk exceeds 5%, a reminder is shown. If the smoking status or the presence of atrial fibrillation are not known, the reminders are shown if the risks exceed 10% or 5% by using the default settings "non-smoker" and "no atrial fibrillation". If the 10-year risk of cardiovascular disease is above 10% reminder 1 (or 3) is shown. If the 10-year stroke risk is above 5% reminder 2 (or 4) is shown.</p> | 1               | Type 2 diabetes - increased cardiovascular risk (UKPDS).    | The risk of cardiovascular event is @1% in ten years according to the UKPDS risk engine.                                                                                                                                                                        |
|                                                                                                                                                                                                                                                                                                                                                                                                                                                                                                                                                                                                                                                                                                                 | 2               | Type 2 diabetes - increased stroke risk (UKPDS).            | This patient's ten-year risk of stroke is @1%, as calculated with the UKPDS Risk Engine.                                                                                                                                                                        |
|                                                                                                                                                                                                                                                                                                                                                                                                                                                                                                                                                                                                                                                                                                                 | 3               | Type 2 diabetes, unknown smoking status - increased         | This patient's ten-year risk of a cardiovascular event is @1%, as calculated with the UKPDS Risk Engine. Since information about this patient's smoking                                                                                                         |

Additional file 1 – Examples of implemented decision support rules for diabetes and the reminders that may be triggered depending on the patient.

|                                                                                                                                                                                                                                                                                                                                                              |   |                                                                         |                                                                                                                                                                                                                                                               |
|--------------------------------------------------------------------------------------------------------------------------------------------------------------------------------------------------------------------------------------------------------------------------------------------------------------------------------------------------------------|---|-------------------------------------------------------------------------|---------------------------------------------------------------------------------------------------------------------------------------------------------------------------------------------------------------------------------------------------------------|
|                                                                                                                                                                                                                                                                                                                                                              |   | cardiovascular risk (UKPDS)                                             | status was not found, the risk was calculated for a non-smoker. If the patient is a smoker, the ten-yea                                                                                                                                                       |
|                                                                                                                                                                                                                                                                                                                                                              | 4 | Type 2 diabetes, unknown smoking status - increased stroke risk (UKPDS) | This patient's ten-year risk of stroke is @1%, as calculated with the UKPDS Risk Engine. Since information about this patient's smoking status was not found, the risk was calculated for a non-smoker. If the patient is a smoker, the ten-year risk is @2%. |
| Recall of patients with diabetes (scr00492)<br>If none of the following laboratory tests has been taken during the last 13 months, a reminder on recalling the patient is shown: HbA1c, blood glucose, cholesterol.                                                                                                                                          | 1 | Diabetes - time for the annual follow-up appointment?                   | This patient has diabetes. More than 13 months have passed since blood glucose and cholesterol were measured. Time for the annual follow-up appointment?                                                                                                      |
| Screening for diabetic nephropathy in type 2 diabetes (scr00549)<br>Albuminuria screening is recommended annually for patients with type 2 diabetes, if no result is available or the last result was negative.                                                                                                                                              | 1 | Type 2 diabetes - time for nephropathy screening?                       | This patient has type 2 diabetes, and no screening for microalbuminuria has been carried out during the last year. Annual screening for microalbuminuria is recommended in type 2 diabetes.                                                                   |
| Intensifying diabetes treatment in recently diagnosed type 2 diabetes (scr00564)<br>If a patient with fresh (at most 2 years old) type 2 diabetes has an elevated HbA1c level (> 6,5 %) but no insulin treatment, the user is recommended to intensify hyperglycaemia treatment according to the flow-sheet described in the Finnish Current Care Guideline. | 1 | Type 2 diabetes and high HbA1c - intensify diabetes treatment?          | This patient has type 2 diabetes and the HbA1c value is high (@1). Consider intensifying diabetes treatment.                                                                                                                                                  |

---
