# Supplementary material for: Patient-specific computer-based decision support in primary healthcare—a randomized trial
Source: PubMed Central journal article supplement (PMC3901002; doi:10.1186/1748-5908-9-15), 2014-01-20
Supplement: 1748-5908-9-15-S2.pdf [file 1748-5908-9-15-S2.pdf]

Additional file 2 – All analysed reminders

| Decision support rule ID                                                | Decision support title                                                           | Reminder number | Reminder short version                                                          |
|-------------------------------------------------------------------------|----------------------------------------------------------------------------------|-----------------|---------------------------------------------------------------------------------|
| <b>Cardiovascular diseases (IX, Diseases of the circulatory system)</b> |                                                                                  |                 |                                                                                 |
| scr00001                                                                | Aspirin for nitrate users                                                        | 1               | Coronary heart disease? Start aspirin now?                                      |
|                                                                         |                                                                                  | 2               | Coronary heart disease? Start aspirin? Note asthma.                             |
| scr00050                                                                | Checking for hyperthyroidism in recent onset atrial fibrillation                 | 1               | Atrial fibrillation - check thyroid function tests?                             |
| scr00109                                                                | Replacing atenolol with other antihypertensives                                  | 1               | Atenolol as an antihypertensive agent? Replace with another drug?               |
| scr00270                                                                | High BNP or proBNP; untreated heart failure                                      | 1               | High BNP - untreated heart failure?                                             |
|                                                                         |                                                                                  | 2               | Increased Nt-proBNP - untreated heart failure?                                  |
| scr00271                                                                | Intensifying treatment of congestive heart failure because of high BNP or proBNP | 1               | Significantly high BNP - intensify heart failure treatment?                     |
|                                                                         |                                                                                  | 2               | Significantly high proBNP - intensify heart failure treatment?                  |
| scr00276                                                                | Follow-up of patients with congestive heart failure using spironolactone         | 1               | This patient is taking spironolactone - check electrolytes?                     |
|                                                                         |                                                                                  | 2               | Spironolactone started - check electrolytes and renal function?                 |
|                                                                         |                                                                                  | 3               | Spironolactone and hyperkalaemia - stop spironolactone or reduce its dose?      |
|                                                                         |                                                                                  | 4               | Spironolactone and hyperkalaemia – check potassium within 1 week.               |
|                                                                         |                                                                                  | 5               | Spironolactone and impaired renal function - stop spironolactone?               |
|                                                                         |                                                                                  | 6               | This patient is taking spironolactone - check renal function?                   |
|                                                                         |                                                                                  | 7               | Patient on spironolactone, and ACE/ARB started – check potassium and creatinine |

Additional file 2 – All analysed reminders

|          |                                                                                  |   |                                                                                                                                                                            |
|----------|----------------------------------------------------------------------------------|---|----------------------------------------------------------------------------------------------------------------------------------------------------------------------------|
| scr00280 | Drug combinations not recommended for patients with congestive heart failure     | 1 | Avoid the combination of an ACE inhibitor, angiotensin-receptor blocker and spironolactone                                                                                 |
| scr00281 | Harmful effects of NSAIDs in patients with congestive heart failure              | 1 | Avoid NSAIDs in patients with heart failure                                                                                                                                |
| scr00423 | Pentoxifylline for venous leg ulcers                                             | 1 | Chronic leg ulcer - consider pentoxifylline?                                                                                                                               |
| scr00434 | Indications for antihypertensive drug therapy based on total cardiovascular risk | 1 | High blood pressure - start antihypertensive drugs?                                                                                                                        |
|          |                                                                                  | 2 | High blood pressure and increased cardiovascular risk according to the SCORE system – start antihypertensive drugs after follow-up?                                        |
|          |                                                                                  | 3 | Elevated blood pressure and increased cardiovascular risk according to the SCORE system – consider antihypertensive drugs?                                                 |
|          |                                                                                  | 4 | Elevated blood pressure and increased risk of cardiovascular disease according to the SCORE system. Check smoking status and start antihypertensive drugs?                 |
|          |                                                                                  | 5 | Elevated blood pressure and increased risk of cardiovascular disease according to the SCORE system. Check smoking status and start antihypertensive drugs after follow-up? |
|          |                                                                                  | 6 | Elevated blood pressure and increased risk of cardiovascular disease according to the SCORE system - check smoking status and consider antihypertensive drugs?             |
| scr00436 | High SCORE risk in patients with unknown smoking status                          | 1 | High cardiovascular risk (SCORE) - check smoking status?                                                                                                                   |
|          |                                                                                  | 2 | Very high cardiovascular risk (SCORE) - check smoking status?                                                                                                              |

Additional file 2 – All analysed reminders

|          |                                                                                                    |   |                                                                                                 |
|----------|----------------------------------------------------------------------------------------------------|---|-------------------------------------------------------------------------------------------------|
| scr00457 | Anticoagulants for atrial fibrillation                                                             | 1 | Atrial fibrillation - start warfarin?                                                           |
|          |                                                                                                    | 2 | Atrial fibrillation - consider warfarin?                                                        |
| scr00462 | Beta-blockers after myocardial infarction                                                          | 1 | Recent myocardial infarction - start a beta-blocker?                                            |
| scr00540 | Aspirin plus dipyridamole for recurrent TIA                                                        | 1 | Recurrent TIA - add dipyridamole?                                                               |
|          |                                                                                                    | 2 | Recurrent TIA - start aspirin + dipyridamole?                                                   |
| scr00547 | Smoking cessation for secondary prevention in atherosclerotic disease                              | 1 | Atherosclerotic disease - stop smoking?                                                         |
|          |                                                                                                    | 2 | Atherosclerotic disease - attempt to stop smoking again?                                        |
| scr00578 | Follow-up of patients with hypertension                                                            | 1 | Hypertension - time to check blood pressure?                                                    |
|          |                                                                                                    | 2 | Elevated blood pressure in last measurement - time to check blood pressure?                     |
| scr00588 | The choice of NSAIDs in people with high cardiovascular risk                                       | 2 | Increased cardiovascular risk - change diclofenac to paracetamol or naproxen?                   |
|          |                                                                                                    | 3 | Increased cardiovascular risk - change high-dose ibuprofen to naproxen or non-NSAIDs?           |
|          |                                                                                                    | 1 | Increased cardiovascular risk - change the COX-2 inhibitor to paracetamol or naproxen?          |
|          |                                                                                                    | 4 | Increased cardiovascular risk - change the COX-2 inhibitor to paracetamol or naproxen?          |
|          |                                                                                                    | 5 | Increased cardiovascular risk - change diclofenac to paracetamol or naproxen?                   |
|          |                                                                                                    | 6 | Increased cardiovascular risk - change high-dose ibuprofen to naproxen or non-NSAIDs?           |
| scr00610 | Avoiding the combination of an anticoagulant and antiplatelet agent in peripheral arterial disease | 1 | Peripheral arterial disease - avoid the combination of an anticoagulant and antiplatelet agent? |

Additional file 2 – All analysed reminders

|                                                                                                                                        |                                                                                                                  |   |                                                                                                                                |
|----------------------------------------------------------------------------------------------------------------------------------------|------------------------------------------------------------------------------------------------------------------|---|--------------------------------------------------------------------------------------------------------------------------------|
|                                                                                                                                        |                                                                                                                  | 2 | Peripheral arterial disease - avoid the combination of an anticoagulant and antiplatelet agent? Note: Recent coronary stenting |
| scr00675                                                                                                                               | Indications for antihypertensive drug therapy in patients with cardiovascular disease, renal disease or diabetes | 1 | Hypertension and a disease which may increase cardiovascular risk - treat hypertension?                                        |
| <b>Congenital abnormalities (XVII, Congenital malformations, deformations and chromosomal abnormalities/Chromosomal abnormalities)</b> |                                                                                                                  |   |                                                                                                                                |
| scr00046                                                                                                                               | TSH screening in Down syndrome                                                                                   | 1 | Down syndrome - check TSH?                                                                                                     |
|                                                                                                                                        |                                                                                                                  | 2 | Down syndrome and high TSH - hypothyroidism?                                                                                   |
|                                                                                                                                        |                                                                                                                  | 3 | Down syndrome and low TSH - hyperthyroidism?                                                                                   |
| <b>Ear diseases (VIII, Diseases of the ear and mastoid process)</b>                                                                    |                                                                                                                  |   |                                                                                                                                |
| scr00424                                                                                                                               | Avoiding decongestants and antihistamines in otitis media in children                                            | 1 | Otitis media - avoid decongestants and antihistamines                                                                          |
| <b>Endocrine and metabolic diseases(IV, Endocrine, nutritional and metabolic diseases)</b>                                             |                                                                                                                  |   |                                                                                                                                |
| scr00016                                                                                                                               | Metformin is the first choice oral hypoglycaemic agent in type 2 diabetes                                        | 1 | Type 2 diabetes - start metformin?                                                                                             |
|                                                                                                                                        |                                                                                                                  | 2 | Type 2 diabetes - start metformin? Note GFR.                                                                                   |
|                                                                                                                                        |                                                                                                                  | 3 | Type 2 diabetes - check renal function and start metformin?                                                                    |
| scr00019                                                                                                                               | ACE inhibitor or sartan for diabetic patients with albuminuria                                                   | 1 | Diabetes and microalbuminuria - start ACE inhibitor or sartan?                                                                 |
|                                                                                                                                        |                                                                                                                  | 2 | Diabetes and albuminuria - start ACE inhibitor or sartan?                                                                      |
| scr00025                                                                                                                               | Glimepiride warning in renal insufficiency                                                                       | 1 | Glimepiride treatment - impaired renal function noted?                                                                         |
|                                                                                                                                        |                                                                                                                  | 2 | Discontinue glimepiride due to impaired renal function?                                                                        |

Additional file 2 – All analysed reminders

|          |                                                                                                |   |                                                                                                |
|----------|------------------------------------------------------------------------------------------------|---|------------------------------------------------------------------------------------------------|
| scr00026 | Glipizide warning in renal insufficiency                                                       | 1 | Glipizide treatment - impaired renal function noted?                                           |
|          |                                                                                                | 2 | Discontinue glipizide due to impaired renal function?                                          |
| scr00030 | Interpreting abnormal thyroid function test results                                            | 1 | Abnormal thyroid function test results - untreated hyperthyroidism?                            |
|          |                                                                                                | 2 | Abnormal thyroid function test results - untreated hypothyroidism?                             |
|          |                                                                                                | 3 | Slightly increased TSH - repeat the test                                                       |
|          |                                                                                                | 4 | Abnormal thyroid function test results - untreated hypothyroidism?                             |
|          |                                                                                                | 5 | Abnormal thyroid function tests - untreated hyperthyroidism?                                   |
| scr00129 | UKPDS Risk Engine to calculate cardiovascular and stroke risk in patients with type 2 diabetes | 1 | Type 2 diabetes - increased cardiovascular risk (UKPDS).                                       |
|          |                                                                                                | 2 | Type 2 diabetes - increased stroke risk (UKPDS).                                               |
|          |                                                                                                | 3 | Type 2 diabetes, unknown smoking status - increased cardiovascular risk (UKPDS)                |
|          |                                                                                                | 4 | Type 2 diabetes, unknown smoking status - increased stroke risk (UKPDS)                        |
| scr00492 | Recall of patients with diabetes                                                               | 1 | Diabetes - time for the annual follow-up appointment?                                          |
| scr00508 | Hypertension and hypokalaemia                                                                  | 1 | A thiazide and hypokalaemia - change to a potassium-sparing diuretic?                          |
|          |                                                                                                | 2 | Hypokalaemia whilst using potassium-sparing diuretics – consult a specialist physician?        |
|          |                                                                                                | 3 | Hypertension and hypokalaemia - hyperaldosteronism ruled out?                                  |
|          |                                                                                                | 4 | Hypertension and significant hypokalaemia - rule out hyperaldosteronism and treat hypokalaemia |
|          |                                                                                                | 5 | Hypertension and hypokalaemia in the last measurement - re-check potassium?                    |

Additional file 2 – All analysed reminders

|                                                                          |                                                                                                                     |   |                                                                                                                 |
|--------------------------------------------------------------------------|---------------------------------------------------------------------------------------------------------------------|---|-----------------------------------------------------------------------------------------------------------------|
| scr00549                                                                 | Screening for diabetic nephropathy in type 2 diabetes                                                               | 1 | Type 2 diabetes - time for nephropathy screening?                                                               |
| scr00550                                                                 | Nephropathy screening in type 1 diabetes                                                                            | 1 | Type 1 diabetes - time for nephropathy screening?                                                               |
| scr00564                                                                 | Intensifying diabetes treatment in recently diagnosed type 2 diabetes                                               | 1 | Type 2 diabetes and high HbA1c - intensify diabetes treatment?                                                  |
| scr00581                                                                 | ACE inhibitors or angiotensin-receptor blockers for patients with diabetes and hypertension but no microalbuminuria | 1 | Diabetes and hypertension - start an ACE inhibitor or angiotensin-receptor blocker to prevent microalbuminuria? |
| scr00663                                                                 | Poorly controlled hypothyroidism                                                                                    | 1 | Hypothyroidism - too high thyroxine dose?                                                                       |
|                                                                          |                                                                                                                     | 2 | Hypothyroidism - too low thyroxine dose?                                                                        |
| scr00665                                                                 | An abnormal potassium result                                                                                        | 1 | Serum potassium is dangerously out of range (@1)!                                                               |
|                                                                          |                                                                                                                     | 2 | Serum potassium is out of range (@1)                                                                            |
|                                                                          |                                                                                                                     | 3 | Serum potassium is slightly out of range (@1)                                                                   |
| <b>Gastrointestinal diseases (XI, Diseases of the digestive system)</b>  |                                                                                                                     |   |                                                                                                                 |
| scr00513                                                                 | PPIs for maintenance therapy of reflux oesophagitis                                                                 | 1 | If gastroesophageal reflux disease becomes symptomatic, consider proton pump inhibitors (PPIs)?                 |
| <b>Genitourinary diseases (XIV Diseases of the genitourinary system)</b> |                                                                                                                     |   |                                                                                                                 |
| scr00107                                                                 | GFR below 55 ml/min                                                                                                 | 2 | Decreased GFR and not recent creatinine test - order new creatinine test?                                       |
|                                                                          |                                                                                                                     | 1 | Decreased GFR - no diagnosis of renal failure                                                                   |
| scr00428                                                                 | Managing male sexual dysfunction associated with SSRIs                                                              | 1 | Erectile dysfunction - start a PDE-5 inhibitor?                                                                 |
| scr00444                                                                 | ACE inhibitors for hypertension in patients with non-diabetic renal disease                                         | 1 | Renal hypertension? Consider an ACE inhibitor?                                                                  |

Additional file 2 – All analysed reminders

|                                                                                                                                            |                                                                            |   |                                                                                                             |
|--------------------------------------------------------------------------------------------------------------------------------------------|----------------------------------------------------------------------------|---|-------------------------------------------------------------------------------------------------------------|
| scr00482                                                                                                                                   | Local oestrogen for vaginal atrophy in postmenopausal women                | 1 | Vaginal atrophy and possible menopause - start local oestrogen?                                             |
|                                                                                                                                            |                                                                            | 2 | Vaginal atrophy after oophorectomy - start local oestrogen?                                                 |
| scr00512                                                                                                                                   | NSAIDs contributing to acute renal failure                                 | 1 | Low GFR - consider the role of NSAIDs?                                                                      |
| scr00538                                                                                                                                   | Limiting the duration of hormone replacement therapy                       | 1 | Time to discontinue HRT?                                                                                    |
| <b>Haematological diseases (III, Diseases of the blood and blood-forming organs and certain disorders involving the immune mechanism )</b> |                                                                            |   |                                                                                                             |
| scr00554                                                                                                                                   | Low-dose aspirin for patients with polycythaemia vera                      | 1 | Polycythaemia vera - start low-dose aspirin as prophylaxis against thrombosis?                              |
|                                                                                                                                            |                                                                            | 2 | Polycythaemia vera - start low-dose aspirin as prophylaxis against thrombosis? Note: previous peptic ulcer. |
| scr00664                                                                                                                                   | Low haemoglobin concentration in adults and adolescents                    | 1 | Decreased haemoglobin concentration - start investigations?                                                 |
| <b>Infectious diseases (I, Certain infectious and parasitic diseases)</b>                                                                  |                                                                            |   |                                                                                                             |
| scr00677                                                                                                                                   | Follow-up and contact tracing in sexually transmitted chlamydia infections | 1 | New case of chlamydia - retest after treatment and facilitate testing of partners!                          |
|                                                                                                                                            |                                                                            | 2 | A recently diagnosed chlamydia - verify that the treatment was successful!                                  |
| <b>Mental and behavioural disorders (V)</b>                                                                                                |                                                                            |   |                                                                                                             |
| scr00340                                                                                                                                   | WBC monitoring during clozapine treatment                                  | 1 | Clozapine treatment - check WBC count at least twice weekly                                                 |
|                                                                                                                                            |                                                                            | 2 | Clozapine treatment and decreased WBC count - discontinue clozapine, check WBC count daily                  |
|                                                                                                                                            |                                                                            | 3 | Clozapine treatment - check WBC count?                                                                      |
| scr00470                                                                                                                                   | Continuing antipsychotics in patients with schizophrenia                   | 1 | Recent acute episode of schizophrenia - continue antipsychotic treatment?                                   |
| scr00516                                                                                                                                   | SSRIs for post-traumatic stress disorder                                   | 1 | Post-traumatic stress disorder (PTSD) - consider using SSRIs?                                               |

Additional file 2 – All analysed reminders

| <b>Musculoskeletal diseases (XIII, Diseases of the musculoskeletal system and connective tissue)</b> |                                                                                   |   |                                                                        |
|------------------------------------------------------------------------------------------------------|-----------------------------------------------------------------------------------|---|------------------------------------------------------------------------|
| scr00012                                                                                             | Prevention of osteoporosis in long-term use of glucocorticoids                    | 1 | Long-term glucocorticoids - add calcium and vitamin D?                 |
|                                                                                                      |                                                                                   | 2 | Long-term glucocorticoids – add a bisphosphonate?                      |
| scr00035                                                                                             | Stopping bisphosphonates after 5 years of treatment                               | 1 | Time to stop bisphosphonate treatment?                                 |
| scr00676                                                                                             | Follow-up tests for antirheumatic drugs                                           | 1 | Antirheumatic drug therapy - follow-up tests due?                      |
| <b>Neoplastic diseases (II, Neoplasms)</b>                                                           |                                                                                   |   |                                                                        |
| scr00094                                                                                             | Follow-up of high PSA concentration                                               | 1 | High PSA - time to repeat the test?                                    |
|                                                                                                      |                                                                                   | 2 | High PSA - time to repeat the test? Note 5-alpha reductase medication  |
| scr00464                                                                                             | Bisphosphonates for myeloma                                                       | 1 | This patient has myeloma - start bisphosphonate treatment?             |
| <b>Nervous system diseases (VI, Diseases of the nervous system)</b>                                  |                                                                                   |   |                                                                        |
| scr00425                                                                                             | SSRIs not indicated for headaches                                                 | 1 | Headache - SSRIs are not recommended                                   |
| <b>Respiratory diseases (X, Diseases of the respiratory system)</b>                                  |                                                                                   |   |                                                                        |
| scr00422                                                                                             | Cardioselective beta-blockers for patients with asthma/COPD                       | 1 | Obstructive pulmonary disease - change to a selective beta-blocker?    |
| scr00450                                                                                             | Inhaled corticosteroids preferred to anti-leukotrienes in the treatment of asthma | 1 | Consider inhaled corticosteroids?                                      |
| scr00494                                                                                             | Inhaled corticosteroids instead of oral steroids for chronic asthma               | 1 | Asthma treated with oral steroids - start inhaled steroids?            |
|                                                                                                      |                                                                                   | 2 | Asthma treated with courses of oral steroids - start inhaled steroids? |
| scr00534                                                                                             | Drugs for preventing frequent exacerbations of COPD                               | 1 | Frequent COPD exacerbations - add tiotropium?                          |
|                                                                                                      |                                                                                   | 2 | Frequent COPD exacerbations - add a mucolytics?                        |



Additional file 2 – All analysed reminders

|          |                                         |  |   |                                                        |
|----------|-----------------------------------------|--|---|--------------------------------------------------------|
|          |                                         |  | 3 | Frequent COPD exacerbations - add an inhaled steroids? |
| scr00539 | Intranasal steroids for nasal polyposis |  | 1 | Nasal polyposis - start intranasal steroids?           |
