# Supplementary material for: Patient-specific computer-based decision support in primary healthcare—a randomized trial
Source: PubMed Central journal article supplement (PMC3901002; doi:10.1186/1748-5908-9-15), 2014-01-20
Supplement: 1748-5908-9-15-S3.pdf [file 1748-5908-9-15-S3.pdf]

Additional file 3 – Reminders that were excluded after local piloting.

| Decision support rule ID                                                                   | Decision support title                                                                        | Reminder number | Reminder short version                                                                   | Reason for exclusion        |
|--------------------------------------------------------------------------------------------|-----------------------------------------------------------------------------------------------|-----------------|------------------------------------------------------------------------------------------|-----------------------------|
| <b>Cardiovascular diseases (IX, Diseases of the circulatory system)</b>                    |                                                                                               |                 |                                                                                          |                             |
| scr00279                                                                                   | Initial dose of angiotensin-receptor blockers in patients with congestive heart failure       | 1               | Losartan treatment about to start - too high initial dose?                               | not triggered in population |
|                                                                                            |                                                                                               | 2               | Candesartan treatment about to start - too high initial dose?                            |                             |
|                                                                                            |                                                                                               | 3               | Valsartan treatment about to start - too high initial dose?                              |                             |
| scr00426                                                                                   | Aspirin after endovascular treatment or bypass surgery to the lower limbs                     | 1               | This patient has undergone endovascular treatment - aspirin is indicated.                | not triggered in population |
| scr00437                                                                                   | Need to intensify dyslipidaemia treatment in patients with established cardiovascular disease | 1               | Cardiovascular disease and high LDL-cholesterol - intensify dyslipidaemia treatment?     | not calculable              |
|                                                                                            |                                                                                               | 2               | Cardiovascular disease and LDL-cholesterol slightly above target                         |                             |
|                                                                                            |                                                                                               | 3               | Diabetes, microalbuminuria and high LDL-cholesterol - intensify dyslipidaemia treatment? |                             |
|                                                                                            |                                                                                               | 4               | Diabetes and LDL-cholesterol slightly above target                                       |                             |
| scr00577                                                                                   | Drug therapy for severe pulmonary hypertension                                                | 1               | Severe pulmonary hypertension - intensify treatment?                                     | not triggered in population |
| <b>Endocrine and metabolic diseases(IV, Endocrine, nutritional and metabolic diseases)</b> |                                                                                               |                 |                                                                                          |                             |
| scr00020                                                                                   | Routine procedures when starting a glitazone                                                  | 1               | Glitazone treatment about to start - contraindicated due to heart failure?               | not calculable              |

Additional file 3 – Reminders that were excluded after local piloting.

| Decision support rule ID                                          | Decision Support title                                     | Reminder number | Reminder short version                                                            | Reason for exclusion        |
|-------------------------------------------------------------------|------------------------------------------------------------|-----------------|-----------------------------------------------------------------------------------|-----------------------------|
|                                                                   |                                                            |                 | Glitazone treatment about to start - contraindicated due to insulin treatment?    |                             |
|                                                                   |                                                            | 2               | Glitazone treatment about to start - information given about the risk of anaemia? |                             |
|                                                                   |                                                            | 3               | Glitazone treatment about to start - possible interactions noted?                 |                             |
|                                                                   |                                                            | 4               | Glitazone treatment about to start - weight monitoring arranged?                  |                             |
| scr00086                                                          | Diabetes risk test for patients with BMI above 30          | 1               | Overweight - diabetes risk test indicated                                         | not calculable              |
| scr00090                                                          | Diagnosing T3 hyperthyroidism                              | 1               | Low TSH but normal T4 - check T3?                                                 | not calculable              |
| scr00265                                                          | Laboratory results in patients with Type 1 diabetes        | 1               | Type 1 diabetes with poor glycaemic control                                       | not calculable              |
|                                                                   |                                                            | 2               | Type 1 diabetes with suboptimal glycaemic control                                 |                             |
|                                                                   |                                                            | 3               | Type 1 diabetes and high LDL-cholesterol                                          |                             |
|                                                                   |                                                            | 4               | Type 1 diabetes and raised LDL-cholesterol                                        |                             |
|                                                                   |                                                            | 5               | Type 1 diabetes and renal failure                                                 |                             |
|                                                                   |                                                            | 6               | Type 1 diabetes and proteinuria                                                   |                             |
|                                                                   |                                                            | 7               | Type 1 diabetes and microalbuminuria                                              |                             |
| Gastrointestinal diseases (XI, Diseases of the digestive system)  |                                                            |                 |                                                                                   |                             |
| scr00509                                                          | Helicobacter eradication in patients with a bleeding ulcer | 1               | Bleeding peptic ulcer - Helicobacter pylori successfully eradicated?              | not triggered in population |
| Genitourinary diseases (XIV Diseases of the genitourinary system) |                                                            |                 |                                                                                   |                             |

Additional file 3 – Reminders that were excluded after local piloting.

| Decision support rule ID                                                                                                            | Decision support title                                                                           | Reminder number             | Reminder short version                                                                | Reason for exclusion        |
|-------------------------------------------------------------------------------------------------------------------------------------|--------------------------------------------------------------------------------------------------|-----------------------------|---------------------------------------------------------------------------------------|-----------------------------|
| scr00070                                                                                                                            | Anaemia in patients with menorrhagia                                                             | 1                           | Menorrhagia and severe anaemia - consult a specialist?                                | not calculable              |
| scr00006                                                                                                                            | Polycystic ovary syndrome (PCOS) and metabolic risks                                             | 2                           | Menorrhagia and moderate anaemia - start investigations into the cause of anaemia?    | not triggered in population |
|                                                                                                                                     |                                                                                                  | 3                           | Menorrhagia - check haemoglobin?                                                      |                             |
|                                                                                                                                     |                                                                                                  | 1                           | PCOS - give information about risks related to metabolic syndrome.                    |                             |
|                                                                                                                                     |                                                                                                  | 2                           | PCOS - check blood glucose?                                                           |                             |
| 3                                                                                                                                   | PCOS - check lipid profile?                                                                      | not triggered in population |                                                                                       |                             |
| 4                                                                                                                                   | PCOS and the patient is overweight - suggest weight reduction?                                   |                             |                                                                                       |                             |
| scr00535                                                                                                                            | SSRIs in premenstrual syndrome                                                                   | 1                           | Recurrent premenstrual syndrome - try SSRIs?                                          | not triggered in population |
| scr00599                                                                                                                            | Phosphodiesterase inhibitors for erectile dysfunction in patients with diabetes mellitus         | 1                           | Erectile dysfunction and diabetes - try a phosphodiesterase inhibitor?                | not triggered in population |
| Haematological diseases (III, Diseases of the blood and blood-forming organs and certain disorders involving the immune mechanism ) |                                                                                                  |                             |                                                                                       |                             |
| scr00091                                                                                                                            | Diagnosing polycythaemia vera                                                                    | 1                           | High haemoglobin with pancytosis - polycythaemia vera?                                | not calculable              |
| Infectious diseases (I, Certain infectious and paracitic diseases)                                                                  |                                                                                                  |                             |                                                                                       |                             |
| scr00528                                                                                                                            | Metronidazole in preference to vancomycin as the first choice in Clostridium difficile diarrhoea | 1                           | Clostridium difficile diarrhoea - consider using metronidazole instead of vancomycin? | not triggered in population |
| Mental and behavioural disorders (V)                                                                                                |                                                                                                  |                             |                                                                                       |                             |
| scr00043                                                                                                                            | High MCV in men suggesting alcohol abuse                                                         | 1                           | Increased MCV without anaemia - alcohol abuse?                                        | not calculable              |

Additional file 3 – Reminders that were excluded after local piloting.

| Decision support rule ID                                                                      | Decision support title                                                               | Reminder number | Reminder short version                                                                    | Reason for exclusion        |
|-----------------------------------------------------------------------------------------------|--------------------------------------------------------------------------------------|-----------------|-------------------------------------------------------------------------------------------|-----------------------------|
| scr00103                                                                                      | Depression associated with other diseases, medications or addictive substances       | 1               | Newly diagnosed depression - possible aetiological factors?                               | not calculable              |
|                                                                                               |                                                                                      | 2               | Newly diagnosed depression - possible aetiological factors?                               |                             |
|                                                                                               |                                                                                      | 3               | Newly diagnosed depression - possible aetiological factors?                               |                             |
| scr00124                                                                                      | Laboratory tests before antipsychotic treatment                                      | 1               | Antipsychotic medication about to start - test results missing?                           | not calculable              |
| scr00125                                                                                      | Laboratory tests before SSRI treatment                                               | 1               | SSRI medication about to start - check full blood count (including platelets)?            | not calculable              |
|                                                                                               |                                                                                      | 2               | SSRI medication about to start in a patient with diabetes - check fasting glucose?        |                             |
|                                                                                               |                                                                                      | 3               | SSRI medication about to start in a patient taking warfarin - check INR?                  |                             |
| scr00126                                                                                      | Laboratory tests before tricyclic antidepressant treatment                           | 1               | Tricyclic antidepressant treatment about to start - check appropriate laboratory tests?   | not triggered in population |
| scr00127                                                                                      | Laboratory tests before duloxetine, milnacipran, venlafaxine and trazodone treatment | 1               | Antidepressive medication about to start - check full blood count (including platelets)?  | not calculable              |
|                                                                                               |                                                                                      | 2               | Antidepressive medication about to start – check ECG if the patient has cardiac symptoms. |                             |
|                                                                                               |                                                                                      | 3               | Antidepressive medication about to start - check INR?                                     |                             |
| Musculoskeletal diseases (XIII, Diseases of the musculoskeletal system and connective tissue) |                                                                                      |                 |                                                                                           |                             |

Additional file 3 – Reminders that were excluded after local piloting.

| Decision support rule ID                                     | Decision support title                   | Reminder number | Reminder short version                      | Reason for exclusion        |
|--------------------------------------------------------------|------------------------------------------|-----------------|---------------------------------------------|-----------------------------|
| scr00604                                                     | Topical NSAIDs for lateral epicondylitis | 1               | Lateral epicondylitis - try topical NSAIDs? | not triggered in population |
| Respiratory diseases (X, Diseases of the respiratory system) |                                          |                 |                                             |                             |
| scr00592                                                     | Antibiotics for COPD exacerbation        | 1               | COPD exacerbation - consider antibiotics?   | not calculable              |
