# Supplementary material for: Patient-specific computer-based decision support in primary healthcare—a randomized trial
Source: PubMed Central journal article supplement (PMC3901002; doi:10.1186/1748-5908-9-15), 2014-01-20
Supplement: 1748-5908-9-15-S4.pdf [file 1748-5908-9-15-S4.pdf]

Additional file 4 – Decision support rules that were excluded from the analyses for technical and other reasons

| Decision support rule ID                                                                   | Decision support title                                                                | Reminder number | Reminder short version                                                                  |
|--------------------------------------------------------------------------------------------|---------------------------------------------------------------------------------------|-----------------|-----------------------------------------------------------------------------------------|
| <b>Cardiovascular diseases (IX, Diseases of the circulatory system)</b>                    |                                                                                       |                 |                                                                                         |
| scr00435                                                                                   | Indications for lipid-lowering drugs based on total cardiovascular risk               | 1               | High cardiovascular risk (SCORE) - add a statin?                                        |
|                                                                                            |                                                                                       | 2               | Increased LDL-cholesterol - lifestyle advice to reduce lipid values?                    |
|                                                                                            |                                                                                       | 3               | High cardiovascular risk (SCORE) - add a statin?                                        |
|                                                                                            |                                                                                       | 4               | Increased LDL-cholesterol - lifestyle advice to reduce cholesterol?                     |
| scr00447                                                                                   | Follow-up of patients who are taking amiodarone                                       | 1               | Amiodarone treatment about to start - check thyroid function?                           |
|                                                                                            |                                                                                       | 2               | Amiodarone treatment about to start - check liver function?                             |
|                                                                                            |                                                                                       | 3               | Amiodarone treatment about to start - check spirometry?                                 |
|                                                                                            |                                                                                       | 4               | Amiodarone treatment about to start - check chest X-ray?                                |
|                                                                                            |                                                                                       | 5               | Amiodarone treatment - monitor thyroid function.                                        |
|                                                                                            |                                                                                       | 6               | Amiodarone treatment - monitor liver function.                                          |
|                                                                                            |                                                                                       | 7               | Amiodarone treatment - regular ECGs?                                                    |
|                                                                                            |                                                                                       | 8               | Amiodarone treatment - regular chest X-rays?                                            |
| scr00500                                                                                   | Glucose tests for patients with hypertension, dyslipidaemia or cardiovascular disease | 1               | Hypertension and no recent glucose values - check blood glucose?                        |
|                                                                                            |                                                                                       | 2               | Hyperlipidaemia and no recent glucose values - check blood glucose?                     |
|                                                                                            |                                                                                       | 3               | Atherosclerotic disease and no recent glucose values - check blood glucose?             |
| <b>Endocrine and metabolic diseases(IV, Endocrine, nutritional and metabolic diseases)</b> |                                                                                       |                 |                                                                                         |
| scr00022                                                                                   | Intensifying dyslipidaemia treatment in patients with type 2 diabetes                 | 1               | Type 2 diabetes – adequate measures taken to manage dyslipidaemia?                      |
|                                                                                            |                                                                                       | 2               | Type 2 diabetes and arterial disease – adequate measures taken to manage dyslipidaemia? |

Additional file 4 – Decision support rules that were excluded from the analyses for technical and other reasons

| Decision support rule ID                                                                             | Decision support title                                                                                        | Reminder number | Reminder short version                                                         |
|------------------------------------------------------------------------------------------------------|---------------------------------------------------------------------------------------------------------------|-----------------|--------------------------------------------------------------------------------|
| scr00108                                                                                             | Aspirin for patients with type 2 diabetes                                                                     | 1               | Type 2 diabetes - start aspirin?                                               |
|                                                                                                      |                                                                                                               | 2               | Type 2 diabetes - start aspirin? Note asthma.                                  |
| scr00110                                                                                             | Increased fasting blood glucose                                                                               | 1               | Increased blood glucose - diabetes?                                            |
|                                                                                                      |                                                                                                               | 2               | Significantly increased blood glucose - diabetes?                              |
| scr00113                                                                                             | OGTT follow-up after gestational diabetes                                                                     | 1               | History of gestational diabetes – oral glucose tolerance test indicated?       |
| scr00269                                                                                             | LDL-cholesterol concentration in patients with Type 2 diabetes                                                | 1               | Type 2 diabetes and high LDL-cholesterol                                       |
|                                                                                                      |                                                                                                               | 2               | Type 2 diabetes and raised LDL-cholesterol                                     |
|                                                                                                      |                                                                                                               | 3               | Type 2 diabetes and arterial disease - note raised LDL-cholesterol             |
|                                                                                                      |                                                                                                               | 4               | Type 2 diabetes - no results for LDL-cholesterol available                     |
| scr00490                                                                                             | Glucose and lipid tests for patients with BMI above 32                                                        | 1               | High BMI – check blood glucose?                                                |
|                                                                                                      |                                                                                                               | 2               | Overweight? Check blood glucose?                                               |
|                                                                                                      |                                                                                                               | 3               | High BMI - lipid profile due?                                                  |
|                                                                                                      |                                                                                                               | 4               | Overweight - lipid profile due?                                                |
| <b>Gastrointestinal diseases (XI, Diseases of the digestive system)</b>                              |                                                                                                               |                 |                                                                                |
| scr00128                                                                                             | Transglutaminase antibodies instead of gliadin antibodies both for screening and follow-up of coeliac disease | 1               | Gliadin antibodies checked - check also transglutaminase antibodies?           |
| <b>Genitourinary diseases (XIV Diseases of the genitourinary system)</b>                             |                                                                                                               |                 |                                                                                |
| scr00005                                                                                             | Selection of diuretics for people with renal insufficiency                                                    | 1               | Increased creatinine - change thiazide to furosemide?                          |
|                                                                                                      |                                                                                                               | 2               | Thiazide treatment - check creatinine?                                         |
| scr00085                                                                                             | Calcium x phosphate product in patients with renal failure                                                    | 1               | Renal failure and an increased calcium x phosphate product - treatment needed? |
| <b>Musculoskeletal diseases (XIII, Diseases of the musculoskeletal system and connective tissue)</b> |                                                                                                               |                 |                                                                                |

Additional file 4 – Decision support rules that were excluded from the analyses for technical and other reasons

| Decison support rule ID                                     | Decision support title                                | Reminder number | Reminder short version                                            |
|-------------------------------------------------------------|-------------------------------------------------------|-----------------|-------------------------------------------------------------------|
| scr00083                                                    | Folate for patients taking methotrexate               | 1               | Methotrexate treatment - add folate?                              |
| <b>Pregnancy (XV, Pregnancy, childbirth and puerperium)</b> |                                                       |                 |                                                                   |
| scr00453                                                    | Antibiotics for asymptomatic bacteriuria in pregnancy | 1               | This patient is pregnant - prescribe antibiotics for bacteriuria? |
